# Supplementary material
Source: PubMed Central journal article supplement (PMC8419705)

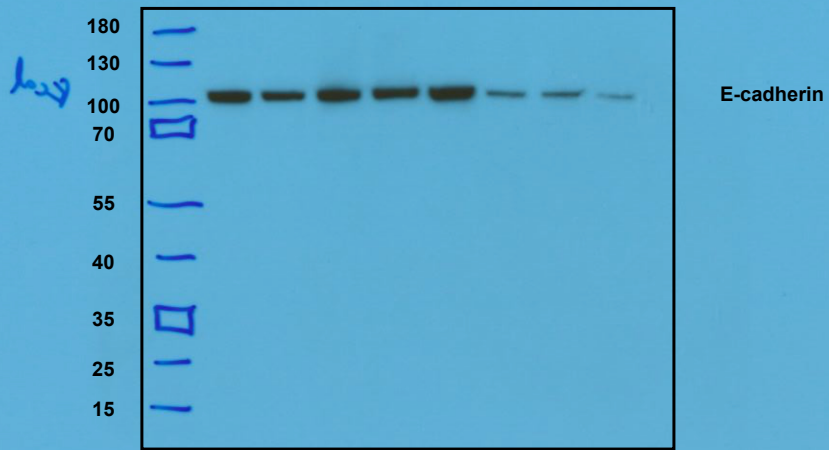

180  
130  
100  
70  
55  
40  
35  
25  
15

*ribonuclease  
+ GAPDH*

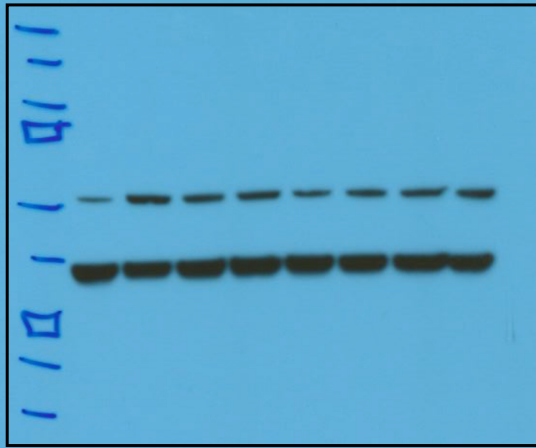

Vimentin

GAPDH

Supplement: EMBR-22-e51872-s006.pdf [file EMBR-22-e51872-s006.pdf]
